# Supplementary material for: Comparing health-related quality of life of Dutch and Chinese patients with traumatic brain injury: do cultural differences play a role?
Source: PubMed Central journal article supplement (PMC5391570; doi:10.1186/s12955-017-0641-9), 2017-04-14

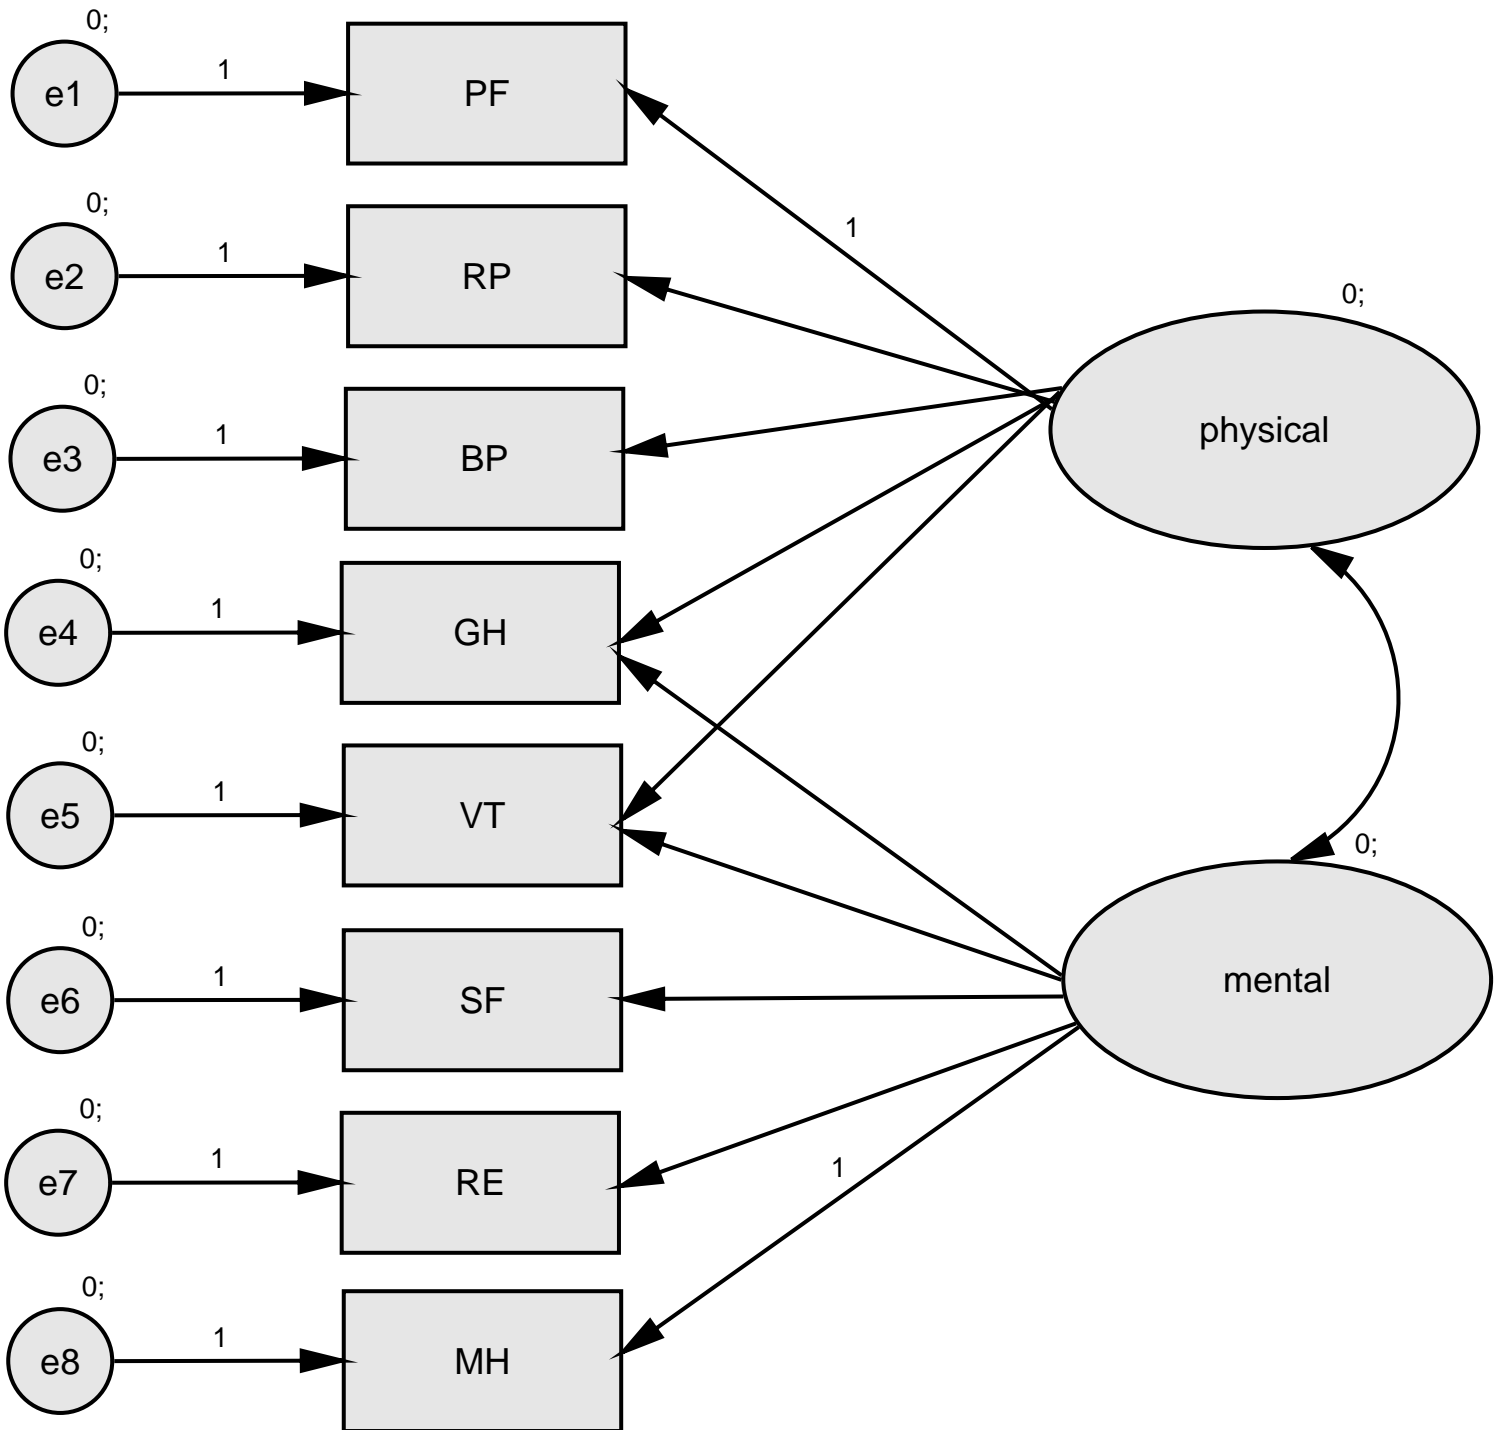

Supplement: 12955_2017_641_MOESM1_ESM.pdf [file 12955_2017_641_MOESM1_ESM.pdf]
